# Supplementary material
Source: PubMed Central journal article supplement (PMC4417380)
Supplement: NIHMS666538-supplement-1.pdf [file NIHMS666538-supplement-1.pdf]

**Supplementary Table S1.** Characteristics of the study populations

| <b>Study name / abbreviation</b>       | <b>Reference</b> | <b>Study design</b>       | <b>Number of cases / controls</b> | <b>Enrollment year(s)</b> | <b>Mammogram film view</b>       | <b>Median interval between mammogram &amp; diagnosis (index date)</b> | <b>Source of cases</b>                         | <b>Source of pathology</b>                                | <b>Source of covariate data</b>                             |
|----------------------------------------|------------------|---------------------------|-----------------------------------|---------------------------|----------------------------------|-----------------------------------------------------------------------|------------------------------------------------|-----------------------------------------------------------|-------------------------------------------------------------|
| Mayo Mammography Health Study /MMHS    | 8, 9             | Nested case-control study | 404/1207                          | 2003-2006                 | CC <sup>a</sup><br>Average       | 3.6 years                                                             | Linkage to clinic and state cancer registries. | Clinic and three state cancer registries; medical records | Questionnaire and medical record review (BMI <sup>b</sup> ) |
| Mayo Clinic Breast Cancer Study /MCBCS | 10, 11           | Case-control study        | 257/178                           | 2001-2008                 | CC <sup>a</sup><br>Contralateral | 1.3 years                                                             | Clinic                                         | Clinic cancer registry; medical records                   | Questionnaire and medical record review (BMI <sup>b</sup> ) |
| Nurses' Health Study /NHS              | 12, 14           | Nested case-control study | 1109/2163                         | 1989-1990                 | CC <sup>a</sup><br>Average       | 5.2 years                                                             | Self-report                                    | Pathology reports and tumor tissue microarray             | Questionnaire                                               |
| Nurses' Health Study II /NHSII         | 13               | Nested case-control study | 365/992                           | 1996-1999                 | CC <sup>a</sup><br>Average       | 4.2 years                                                             | Self-report                                    | Pathology reports and tumor tissue microarray             | Questionnaire                                               |
| Mayo Clinic Mammography Study / MCMAM  | 15               | Nested case-control study | 371/677                           | 1997-2001                 | CC <sup>a</sup><br>Average       | 7.1 years                                                             | Clinic within screening practice               | Clinic cancer registries; medical records                 | Medical record review                                       |

|                                                                                         |       |                                     |           |           |                                  |           |                                                                                                      |      |               |
|-----------------------------------------------------------------------------------------|-------|-------------------------------------|-----------|-----------|----------------------------------|-----------|------------------------------------------------------------------------------------------------------|------|---------------|
| Bay Area<br>Breast Cancer<br>SPORE and<br>San Francisco<br>Mammography<br>Registry/SFMR | 16-18 | Nested<br>case-<br>control<br>study | 1589/3341 | 1996-2007 | CC <sup>a</sup><br>Contralateral | 3.6 years | Linkage to<br>state-wide<br>Surveillance,<br>Epidemiology<br>and End<br>Results<br>(SEER)<br>program | SEER | Questionnaire |
|-----------------------------------------------------------------------------------------|-------|-------------------------------------|-----------|-----------|----------------------------------|-----------|------------------------------------------------------------------------------------------------------|------|---------------|

---

<sup>a</sup>CC, craniocaudal mammogram view

<sup>b</sup>BMI, body mass index
